# Supplementary material for: Zero-dimensional mixed-cation hybrid lead halides with broadband emissions
Source: Royal Society of Chemistry journal article supplement (doi:10.1039/d3qi01749d), 2023-01-01
Supplement: d3qi01749d1.pdf [file d3qi01749d1.pdf]

Supporting Information for

## **Zero-dimensional mixed-cation hybrid lead halides with broadband emissions**

Mirosław Mączka,\* Dawid Drozdowski, Dagmara Stefańska, Anna Gaĝor

*Institute of Low Temperature and Structure Research, Polish Academy of Sciences, ul. Okólna 2,  
50-422 Wrocław, Poland*

e-mail: [m.maczka@intibs.pl](mailto:m.maczka@intibs.pl)

**Table S1.** Experimental and refinement details of Cs<sub>2</sub>MHy<sub>2</sub>PbX<sub>6</sub> (X = Br, I) at 295 K.

|                                                                                                                | Cs <sub>2</sub> MHy <sub>2</sub> PbBr <sub>6</sub> | Cs <sub>2</sub> MHy <sub>2</sub> PbBr <sub>3</sub> I <sub>3</sub> | Cs <sub>2</sub> MHy <sub>2</sub> PbI <sub>6</sub> |
|----------------------------------------------------------------------------------------------------------------|----------------------------------------------------|-------------------------------------------------------------------|---------------------------------------------------|
| <b>Crystal data</b>                                                                                            |                                                    |                                                                   |                                                   |
| Crystal system, space group                                                                                    | Orthorhombic, <i>Cmce</i>                          |                                                                   |                                                   |
| <i>a</i> , <i>b</i> , <i>c</i> (Å)                                                                             | 14.280(4), 12.876(4), 10.772(4)                    | 14.666(4), 13.245(4), 10.986(4)                                   | 15.154(5), 13.629(4), 11.444(4)                   |
| <i>V</i> (Å <sup>3</sup> )                                                                                     | 1980.7(11)                                         | 2134.1(12)                                                        | 2363.6(13)                                        |
| <i>Z</i>                                                                                                       | 4                                                  |                                                                   |                                                   |
| Δ <i>d</i> × 10 <sup>-5</sup> , σ <sup>2</sup>                                                                 | 0.12, 7.67                                         | 29.9, 7.64                                                        | 1.1, 7.25                                         |
| μ (mm <sup>-1</sup> )                                                                                          | 24.23                                              | 21.21                                                             | 18.00                                             |
| Crystal size (mm)                                                                                              | 0.26 × 0.22 × 0.16                                 | 0.26 × 0.19 × 0.15                                                | 0.2 × 0.14 × 0.06                                 |
| <b>Data collection</b>                                                                                         |                                                    |                                                                   |                                                   |
| <i>T</i> <sub>min</sub> , <i>T</i> <sub>max</sub>                                                              | 0.542, 1.000                                       | 0.396, 1.000                                                      | 0.252, 1.000                                      |
| No. of measured, independent and observed [ <i>I</i> > 2σ( <i>I</i> )] reflections                             | 19560, 1048, 998                                   | 41673, 1139, 1097                                                 | 23004, 1260, 1169                                 |
| <i>R</i> <sub>int</sub>                                                                                        | 0.040                                              | 0.034                                                             | 0.038                                             |
| (sin θ/λ) <sub>max</sub> (Å <sup>-1</sup> )                                                                    | 0.625                                              | 0.625                                                             | 0.625                                             |
| <b>Refinement</b>                                                                                              |                                                    |                                                                   |                                                   |
| <i>R</i> [ <i>F</i> <sup>2</sup> > 2σ( <i>F</i> <sup>2</sup> )], <i>wR</i> ( <i>F</i> <sup>2</sup> ), <i>S</i> | 0.018, 0.045, 1.12                                 | 0.023, 0.062, 1.13                                                | 0.024, 0.068, 1.08                                |
| No. of reflections                                                                                             | 1048                                               | 1139                                                              | 1260                                              |
| No. of parameters                                                                                              | 47                                                 | 46                                                                | 46                                                |
| No. of restraints                                                                                              | 15                                                 | 0                                                                 | 0                                                 |
| Δρ <sub>max</sub> , Δρ <sub>min</sub> (e Å <sup>-3</sup> )                                                     | 1.35, -1.37                                        | 0.88, -1.28                                                       | 1.12, -2.54                                       |

**Table S2.** Selected geometric details of Cs<sub>2</sub>MHy<sub>2</sub>PbX<sub>6</sub> (X = Br, I) at 295 K.

| Cs <sub>2</sub> MHy <sub>2</sub> PbBr <sub>6</sub> |            | Cs <sub>2</sub> MHy <sub>2</sub> PbBr <sub>3</sub> I <sub>3</sub> |            | Cs <sub>2</sub> MHy <sub>2</sub> PbI <sub>6</sub> |            |
|----------------------------------------------------|------------|-------------------------------------------------------------------|------------|---------------------------------------------------|------------|
| Pb1—Br1                                            | 3.0186(8)  | Pb1—X1                                                            | 3.1512(7)  | Pb1—Br1                                           | 3.2098(10) |
| Pb1—Br1 <sup>i</sup>                               | 3.0186(8)  | Pb1—X1 <sup>i</sup>                                               | 3.1513(7)  | Pb1—Br1 <sup>i</sup>                              | 3.2099(10) |
| Pb1—Br1 <sup>ii</sup>                              | 3.0186(8)  | Pb1—X1 <sup>ii</sup>                                              | 3.1513(7)  | Pb1—Br1 <sup>ii</sup>                             | 3.2322(8)  |
| Pb1—Br1 <sup>iii</sup>                             | 3.0186(8)  | Pb1—X1 <sup>iii</sup>                                             | 3.1513(7)  | Pb1—Br1 <sup>iii</sup>                            | 3.2321(8)  |
| Pb1—Br2                                            | 3.0115(11) | Pb1—Br2                                                           | 3.0371(11) | Pb1—Br2                                           | 3.2322(8)  |
| Pb1—Br2 <sup>i</sup>                               | 3.0115(11) | Pb1—Br2 <sup>i</sup>                                              | 3.0371(11) | Pb1—Br2 <sup>i</sup>                              | 3.2322(8)  |
| Br1—Pb1—Br1 <sup>iii</sup>                         | 94.49(3)   | X1—Pb1—X1 <sup>iii</sup>                                          | 94.24(3)   | I1—Pb1—I1 <sup>iii</sup>                          | 94.43(3)   |
| Br1—Pb1—Br1 <sup>ii</sup>                          | 85.51(3)   | X1—Pb1—X1 <sup>ii</sup>                                           | 85.76(3)   | I1—Pb1—I1 <sup>ii</sup>                           | 85.57(3)   |
| Br1 <sup>i</sup> —Pb1—Br1 <sup>ii</sup>            | 94.49(3)   | X1 <sup>i</sup> —Pb1—X1 <sup>ii</sup>                             | 94.24(3)   | I1 <sup>i</sup> —Pb1—I1 <sup>ii</sup>             | 94.43(3)   |
| Br1 <sup>i</sup> —Pb1—Br1 <sup>iii</sup>           | 85.51(3)   | X1 <sup>i</sup> —Pb1—X1 <sup>iii</sup>                            | 85.76(3)   | I1 <sup>i</sup> —Pb1—I1 <sup>iii</sup>            | 85.57(3)   |
| Br2—Pb1—Br1                                        | 90.68(2)   | Br2—Pb1—X1                                                        | 91.23(2)   | I2—Pb1—I1                                         | 90.39(2)   |
| Br2—Pb1—Br1 <sup>i</sup>                           | 89.32(2)   | Br2—Pb1—X1 <sup>i</sup>                                           | 88.77(2)   | I2—Pb1—I1 <sup>i</sup>                            | 89.61(2)   |
| Br2—Pb1—Br1 <sup>iii</sup>                         | 90.68(2)   | Br2—Pb1—X1 <sup>iii</sup>                                         | 91.23(2)   | I2—Pb1—I1 <sup>iii</sup>                          | 90.39(2)   |
| Br2—Pb1—Br1 <sup>ii</sup>                          | 89.32(2)   | Br2—Pb1—X1 <sup>ii</sup>                                          | 88.77(2)   | I2—Pb1—I1 <sup>ii</sup>                           | 89.61(2)   |
| Br2 <sup>i</sup> —Pb1—Br1 <sup>i</sup>             | 90.68(2)   | Br2 <sup>i</sup> —Pb1—X1 <sup>i</sup>                             | 91.23(2)   | I2 <sup>i</sup> —Pb1—I1 <sup>i</sup>              | 90.39(2)   |
| Br2 <sup>i</sup> —Pb1—Br1                          | 89.32(2)   | Br2 <sup>i</sup> —Pb1—X1                                          | 88.77(2)   | I2 <sup>i</sup> —Pb1—I1                           | 89.61(2)   |
| Br2 <sup>i</sup> —Pb1—Br1 <sup>ii</sup>            | 90.68(2)   | Br2 <sup>i</sup> —Pb1—X1 <sup>ii</sup>                            | 91.23(2)   | I2 <sup>i</sup> —Pb1—I1 <sup>ii</sup>             | 90.39(2)   |
| Br2 <sup>i</sup> —Pb1—Br1 <sup>iii</sup>           | 89.32(2)   | Br2 <sup>i</sup> —Pb1—X1 <sup>iii</sup>                           | 88.77(2)   | I2 <sup>i</sup> —Pb1—I1 <sup>iii</sup>            | 89.61(2)   |
| Br1—Pb1—Br1 <sup>i</sup>                           | 180.0      | X1—Pb1—X1 <sup>i</sup>                                            | 180.0      | I1—Pb1—I1 <sup>i</sup>                            | 180.0      |
| Br1 <sup>ii</sup> —Pb1—Br1 <sup>iii</sup>          | 180.0      | X1 <sup>ii</sup> —Pb1—X1 <sup>iii</sup>                           | 180.0      | I1 <sup>ii</sup> —Pb1—I1 <sup>iii</sup>           | 180.0      |
| Br2—Pb1—Br2 <sup>i</sup>                           | 180.0      | Br2—Pb1—Br2 <sup>i</sup>                                          | 180.0      | I2—Pb1—I2 <sup>i</sup>                            | 180.0      |

Symmetry codes: (i) -x+1, -y+1, -z+1; (ii) x, -y+1, -z+1; (iii) -x+1, y, z.

**Table S3.** Selected hydrogen-bond parameters of Cs<sub>2</sub>MHy<sub>2</sub>PbX<sub>6</sub> (X = Br, I) at 295 K.

| <i>D</i> —H··· <i>A</i>                                           | <i>D</i> —H (Å) | H··· <i>A</i> (Å) | <i>D</i> ··· <i>A</i> (Å) | <i>D</i> —H··· <i>A</i> (°) |
|-------------------------------------------------------------------|-----------------|-------------------|---------------------------|-----------------------------|
| <b>Cs<sub>2</sub>MHy<sub>2</sub>PbBr<sub>6</sub></b>              |                 |                   |                           |                             |
| N2—H2A···Br2 <sup>i</sup>                                         | 0.89            | 2.46              | 3.326 (9)                 | 164.2                       |
| N2—H2B···Br2 <sup>ii</sup>                                        | 0.89            | 2.61              | 3.386 (9)                 | 146.9                       |
| N2A—H2AA···Br2 <sup>iii</sup>                                     | 0.89            | 2.64              | 3.440 (11)                | 149.3                       |
| N2A—H2AB···Br2 <sup>i</sup>                                       | 0.89            | 2.48              | 3.339 (10)                | 162.5                       |
| <b>Cs<sub>2</sub>MHy<sub>2</sub>PbBr<sub>3</sub>I<sub>3</sub></b> |                 |                   |                           |                             |
| N2—H2A···X2 <sup>ii</sup>                                         | 0.89            | 2.73              | 3.501 (12)                | 145.3                       |
| N2—H2B···X2 <sup>i</sup>                                          | 0.89            | 2.54              | 3.415 (12)                | 169.6                       |
| N2A—H2AA···X2 <sup>i</sup>                                        | 0.89            | 2.53              | 3.407 (17)                | 170.2                       |
| N2A—H2AB···X2 <sup>iii</sup>                                      | 0.89            | 2.83              | 3.59 (2)                  | 144.2                       |
| <b>Cs<sub>2</sub>MHy<sub>2</sub>PbI<sub>6</sub></b>               |                 |                   |                           |                             |
| N2—H2A···I2 <sup>ii</sup>                                         | 0.89            | 2.80              | 3.594 (17)                | 148.7                       |
| N2—H2B···I2 <sup>i</sup>                                          | 0.89            | 2.70              | 3.565 (17)                | 165.1                       |
| N2A—H2AA···I2 <sup>i</sup>                                        | 0.89            | 2.70              | 3.563 (15)                | 164.8                       |
| N2A—H2AB···I2 <sup>iii</sup>                                      | 0.89            | 2.84              | 3.629 (16)                | 149.1                       |

Symmetry code(s): (i) -x+1, -y+1, -z+1; (ii) x, y-1/2, -z+3/2; (iii) -x+1, -y+1/2, z-1/2.

**Table S4.** Raman wavenumbers of internal modes of  $\text{MHy}^+$  (in  $\text{cm}^{-1}$ ) observed for 0D  $\text{Cs}_2\text{MHy}_2\text{PbX}_6$ , 3D  $\text{MHyPbBr}_3$ , 2D  $\text{MHy}_2\text{PbBr}_4$  and 1D  $\text{MHyPbI}_3$  together with the suggested assignment.<sup>a</sup>

| $\text{Cs}_2\text{MHy}_2\text{PbBr}_6$ | $\text{Cs}_2\text{MHy}_2\text{PbBr}_3\text{I}_3$ | $\text{Cs}_2\text{MHy}_2\text{PbI}_3$ | $\text{MHyPbBr}_3$ , <sup>1</sup> | $\text{MHy}_2\text{PbBr}_4$ , <sup>2</sup> | $\text{MHyPbI}_3$ | Assignment                              |
|----------------------------------------|--------------------------------------------------|---------------------------------------|-----------------------------------|--------------------------------------------|-------------------|-----------------------------------------|
| 3279w                                  | 3276w                                            | 3278w                                 | 3287sh+<br>3276vw                 | 3279w                                      | 3283w             | $\nu_{\text{as}}(\text{NH}_2)$          |
| 3236w                                  | 3230w                                            | 3230w                                 | 3217w                             | 3247w                                      | 3226m             | $\nu_{\text{s}}(\text{NH}_2)$           |
| 3165w                                  | 3162w                                            | 3162w                                 | 3164sh+<br>3143w                  | 3171w                                      | 3151w             | $\nu_{\text{as}}(\text{NH}_2^+)$        |
| 3115w                                  | 3128vw                                           | 3110w                                 | 3093vw+<br>3074vw                 | 3087w                                      | 3070w             | $\nu_{\text{s}}(\text{NH}_2^+)$         |
| 3030sh+3021m                           | 3028sh+3018m                                     | 3023sh+3014m                          | 3034sh+<br>3027w                  | 3038w+3029<br>w                            | 3034m+3027m       | $\nu_{\text{as}}(\text{CH}_3)$          |
| 2957s                                  | 2953s                                            | 2948s                                 | 2950s                             | 2957s                                      | 2952s             | $\nu_{\text{s}}(\text{CH}_3)$           |
| 1607s                                  | 1601s                                            | 1601s                                 | 1593m                             | 1615w                                      | 1592m             | $\delta(\text{NH}_2)$                   |
| 1559m                                  | 1559m                                            | 1552m                                 | 1560w                             | 1580m                                      | 1559m             | $\delta(\text{NH}_2^+)$                 |
| 1463m+1456m                            | 1460m+1455m                                      | 1457m+1449m                           | 1444m                             | 1465sh                                     | 1448m+1443m       | $\delta_{\text{as}}(\text{CH}_3)$       |
| 1446s                                  | 1443s                                            | 1441s                                 | 1432sh                            | 1451s                                      | 1435m             | $\delta_{\text{as}}(\text{CH}_3)$       |
| 1420m                                  | 1421m                                            | 1418m                                 | 1412w                             | 1415w                                      | 1411w             | $\delta_{\text{s}}(\text{CH}_3)$        |
|                                        | 1382w                                            |                                       |                                   | 1378sh                                     |                   | $\omega(\text{NH}_2^+)$                 |
| 1382w                                  | 1373w                                            | 1373w                                 | 1384w                             | 1361m                                      | 1360w             | $\omega(\text{NH}_2^+)$                 |
| 1323m                                  | 1321m                                            | 1319m                                 | 1293m+<br>1289m                   | 1321m                                      | 1317w             | $\tau(\text{NH}_2^+)$                   |
| 1203w                                  | 1202w                                            | 1198w                                 | 1217m                             | 1202w                                      | 1195w             | $\rho(\text{CH}_3)+\omega(\text{NH}_2)$ |
| 1135s                                  | 1135s                                            | 1133s                                 | 1109m                             | 1139m                                      | 1129m             | $\tau(\text{NH}_2)+\rho(\text{CH}_3)$   |
| 1100w                                  | 1098w                                            | 1092w                                 | 1082m                             | 1097w                                      | 1087w             | $\rho(\text{CH}_3)+\tau(\text{NH}_2)$   |

|           |      |            |       |       |      |                        |
|-----------|------|------------|-------|-------|------|------------------------|
| 984w+956w | 981w | 975w+957vw | 1002s | 989w  | 975m | $\nu_{as}(\text{CNN})$ |
| 888s      | 886s | 881s       | 871s  | 891s  | 878m | $\nu_s(\text{CNN})$    |
| 863m+848w | 867m | 861w+855m  | 844w  | 869sh | 856m | $\rho(\text{NH}_2^+)$  |
| 712w      |      | 712w       |       |       |      | overtone               |
| 436w      | 435w | 431w       | 449w  | 450w  | 441w | $\delta(\text{CNN})$   |
|           |      |            | 309w  |       |      | MHy-cage mode          |
|           |      |            |       | 346w  | 317w | $\tau(\text{NH}_2)$    |
| 257w      | 251w | 251w       |       | 298vw | 249w | $\tau(\text{CH}_3)$    |

<sup>a</sup> key: vs, very strong; s, strong; m, medium; w, weak; vw, very weak; sh, shoulder; b, broad.  $\nu_s$ ,  $\nu_{as}$ ,  $\delta$ ,  $\rho$ ,  $\omega$  and  $\tau$  denote symmetric stretching, antisymmetric stretching, scissoring, rocking, wagging and twisting vibrations.  $\text{NH}_2$  and  $\text{NH}_2^+$  are terminal and the middle groups in the  $\text{CH}_3\text{NH}_2\text{NH}_2^+$  (MHy<sup>+</sup>) cation, respectively.

#### References:

1. M. Mączka, J. Zienkiewicz and M. Ptak, *J. Phys. Chem. C*, 2022, **126**, 4048-4056.
2. M. Mączka and M. Ptak, *J. Phys. Chem. C*, 2022, **126**, 7991-7998.

**Table S5.** Raman wavenumbers of lattice modes (in  $\text{cm}^{-1}$ ) observed for 0D  $\text{Cs}_2\text{MHy}_2\text{PbX}_6$  and all-inorganic  $\text{Cs}_4\text{PbBr}_6$  together with the suggested assignment.<sup>a</sup>

| $\text{Cs}_2\text{MHy}_2\text{PbBr}_6$ | $\text{Cs}_2\text{MHy}_2\text{PbBr}_3\text{I}_3$ | $\text{Cs}_2\text{MHy}_2\text{PbI}_3$ | $\text{Cs}_4\text{PbBr}_6$ | Assignment                     |
|----------------------------------------|--------------------------------------------------|---------------------------------------|----------------------------|--------------------------------|
| 174s                                   | 153vs                                            | 157s                                  |                            | $T'(MHy^+) + L(MHy^+) + \nu_1$ |
| 138sh                                  | 120sh                                            |                                       | 137sh                      | Overtone                       |
| 125s                                   | 108vs                                            | 93vs                                  | 124vs                      | $\nu_1 + T'(MHy^+) + L(MHy^+)$ |
|                                        |                                                  |                                       | 107w                       | $\nu_2$                        |
| 79s                                    | 68m                                              | 60s                                   | 83vs                       | $\nu_5$                        |
|                                        |                                                  |                                       | 75s                        | $\nu_5$                        |
| 66vs                                   | 56vs                                             | 44vs                                  | 69vs                       | $T'(Cs^+) + L(PbX_6)$          |
| 59vs                                   |                                                  |                                       | 61s+57s                    | $T'(Cs^+) + L(PbX_6)$          |
|                                        |                                                  |                                       | 48s+44s                    | $T'(Cs^+) + L(PbX_6)$          |
| 38m                                    | 35m                                              | 37m                                   | 37m                        | $T'(Cs^+) + L(PbX_6)$          |

<sup>a</sup> key: vs, very strong; s, strong; m, medium; w, weak; sh, shoulder.  $\nu_1$ ,  $\nu_2$  and  $\nu_5$  denote  $\text{PbX}_6$  symmetric stretching, antisymmetric stretching and symmetric bending mode, respectively. T' and L stand for translational and librational modes, respectively.

**Table S6.** Comparison of optical parameters for 0D lead halides.

| compound                                                                               | Structural units, connecting type                                                 | absorption (eV) | PL nm (eV) | Stokes shift (nm) | FWHM (nm) | Reference |
|----------------------------------------------------------------------------------------|-----------------------------------------------------------------------------------|-----------------|------------|-------------------|-----------|-----------|
| $\text{Cs}_2\text{MHy}_2\text{PbI}_6$                                                  | isolated $\text{PbI}_6^{4-}$                                                      | 3.14+3.47       | 637 (1.95) | 280               | 158       | This work |
| $\text{Cs}_4\text{PbI}_6$                                                              | isolated $\text{PbI}_6^{4-}$                                                      | 3.38            |            |                   |           | (i)       |
|                                                                                        |                                                                                   | 3.38            |            |                   |           | (ii)      |
| $\text{MA}_4\text{PbI}_6 \cdot 2\text{H}_2\text{O}$                                    | isolated $\text{PbI}_6^{4-}$                                                      | 3.41            |            |                   |           | (iii)     |
| $\text{Cs}_2\text{MHy}_2\text{PbBr}_3\text{I}_3$                                       | isolated $\text{PbI}_6^{4-}$ and $\text{PbBr}_6^{4-}$                             | 3.33+3.75       | 680 (1.82) | 349               | 230       | This work |
| $\text{Cs}_2\text{MHy}_2\text{PbBr}_6$                                                 | isolated $\text{PbBr}_6^{4-}$                                                     | 3.73+4.07       | 647 (1.92) | 342               | 175       | This work |
| $\text{Cs}_4\text{PbBr}_6$                                                             | isolated $\text{PbBr}_6^{4-}$                                                     | 3.95            |            |                   |           | (i)       |
|                                                                                        |                                                                                   | 3.99            |            |                   |           | (ii)      |
|                                                                                        |                                                                                   | 3.77+4.04       |            |                   |           | This work |
| $\text{MA}_4\text{PbBr}_6 \cdot 2\text{H}_2\text{O}$                                   | isolated $\text{PbBr}_6^{4-}$                                                     | 4.00            |            |                   |           | (iii)     |
|                                                                                        |                                                                                   |                 | 525 (2.36) | ~25               | (iv)      |           |
| $(\text{C}_3\text{N}_3\text{H}_{11}\text{O})_2\text{PbBr}_6 \cdot 4\text{H}_2\text{O}$ | isolated $\text{PbBr}_6^{4-}$                                                     | 3.74            | 568 (2.18) | ~234              | ~150      | (v)       |
| $\text{Bmpip}_2\text{PbBr}_4$                                                          | isolated $\text{PbBr}_4^{2-}$                                                     | 3.57            | 470 (2.64) | 123               | ~100      | (vi)      |
| $(\text{C}_{13}\text{H}_{19}\text{N}_4)_2\text{PbBr}_4$                                | isolated $\text{PbBr}_4^{2-}$                                                     | 3.56            | 460 (2.70) | 111               | 66        | (vii)     |
| $(\text{C}_4\text{H}_8\text{N}_2\text{H}_4)_2\text{PbBr}_6 \cdot 2\text{H}_2\text{O}$  | $\text{Pb}_2\text{Br}_{11}^{7-}$ , corner-sharing                                 | 3.97            |            |                   |           | (viii)    |
| N-benzylpyridinium <sub>6</sub> $\text{Pb}_3\text{Br}_{12}$                            | $\text{Pb}_3\text{Br}_{12}^{6-}$ , face-sharing                                   | 3.90            | 571 (2.17) | 253               | 146       | (ix)      |
| $(\text{C}_9\text{NH}_{20})_7\text{Pb}_3\text{Br}_{12}$                                | $\text{Pb}_3\text{Br}_{12}^{6-}$ , face-sharing                                   | 3.68            | 522 (2.38) | 185               | 134       | (x)       |
| $\text{C}_{12}\text{H}_{30}\text{N}_4\text{Pb}_2\text{Br}_8$                           | $\text{Pb}_4\text{Br}_{16}^{8-}$ , edge-sharing                                   | ~3.76           | 492 (2.52) | ~162              | 182       | (xi)      |
| $\text{Cs}_4\text{PbCl}_6$                                                             | isolated $\text{PbCl}_6^{4-}$                                                     | 4.37            |            |                   |           | (i)       |
|                                                                                        |                                                                                   | 4.36            |            |                   |           | (ii)      |
| $(\text{C}_9\text{NH}_{20})_7(\text{PbCl}_4)\text{Pb}_3\text{Cl}_{11}$                 | isolated $\text{PbCl}_4^{2-}$ and $\text{Pb}_3\text{Cl}_{11}^{5-}$ , face-sharing | 3.56            | 470 (2.64) | 122               | 84        | (xii)     |
| $(\text{TAE})_2[\text{Pb}_2\text{Cl}_{10}]\text{Cl}_2$                                 | $\text{Pb}_2\text{Cl}_{10}^{6-}$ , edge-sharing                                   | 3.77            | 494 (2.51) | 166               | 263       | (xiii)    |

TAE=tris(2-aminoethyl)ammonium, Bmpip=1-butyl-1-methylpiperidinium



- (i) U. Thumu, M. Piotrowski, B. Owens-Baird and Y. V. Kolen'ko, *J. Solid State Chem.*, 2019, **271**, 361-377.
- (ii) K. A. Akkerman, S. Park, E. Radicchi, F. Nunzi, E. Mosconi, F. De Angelis, R. Brescia, P. Rastogi, M. Prato and L. Manna, *Nano Lett.*, 2017, **17**, 1924-1930.
- (iii) B. A. H. Huisman, F. Palazon and H. J. Bolink, *Inorg. Chem.*, 2021, **60**, 5212-5216.
- (iv) S. K. Sharma, C. Phadnis, T. K. Das, A. Kumar, B. Kavaipatti, A. Chowdhury and A. Yella, *Chem. Mater.*, 2019, **31**, 3111-3117.
- (v) B.B. Cui, Y. Han, B. Huang, Y. Zhao, X. Wu, L. Liu, G. Cao, Q. Du, N. Liu, W. Zou, M. Sun, L. Wang, X. Liu, J. Wang, H. Zhou and Q. Chen, *Nat. Commun.*, 2019, **10**, 5190.
- (vi) V. Morad, Y. Shynkarenko, S. Yakunin, A. Brumberg, R. D. Schaller and M.V. Kovalenko, *J. Am. Chem. Soc.*, 2019, **141**, 9764-9768.
- (vii) H. Lin, C. Zhou, M. Chaaban, L.J. Xu, Y. Zhou, J. Neu, M. Worku, E. Berkwits, Q. He, S. Lee, X. Lin, T. Siegrists, M.H. Du and B. Ma, *ACS Mater. Lett.*, 2019, **1**, 594-598.
- (viii) Y. Takeoka, K. Asai, M. Rikukawa and K. Sanui, *Chem. Lett.*, 2005, **34**, 602-603.
- (ix) B. Febriansyah, C. S. D. Neo, D. Giovanni, S. Srivastava, Y. Lekina, T. M. Koh, Y. Li, Z. X. Shen, M. Asta, T. C. Sum, N. Mathews and J. England, *Chem. Mater.*, 2020, **32**, 4431-4441.
- (x) J. Zhou, M. Li, L. Ning, R. Zhang, M. S. Molokeev, J. Zhao, S. Yang, K. Han and Z. Xia, *J. Phys. Chem. Lett.*, 2019, **10**, 1337-1341.
- (xi) D. Tian, Z. Lai, H. Xu, F. Lin, Y. Jiang, Y. Huang, S. Wang, Y. Cai, J. Jin, R. J. Xie and X. Chen, *Chem. Mater.*, 2022, **34**, 5224-5231.
- (xii) C. Zhou, H. Lin, M. Worku, J. Neu, Y. Zhou, Y. Tian, S. Lee, P. Djurovich, T. Siegrist and B. Ma, *J. Am. Chem. Soc.*, 2018, **140**, 13181-13184.
- (xiii) S. Elleuch, A. Lusson, S. Pillet, K. Boukheddaden and Y. Abid, *ACS Photonics* 2020, **7**, 1178-1197.

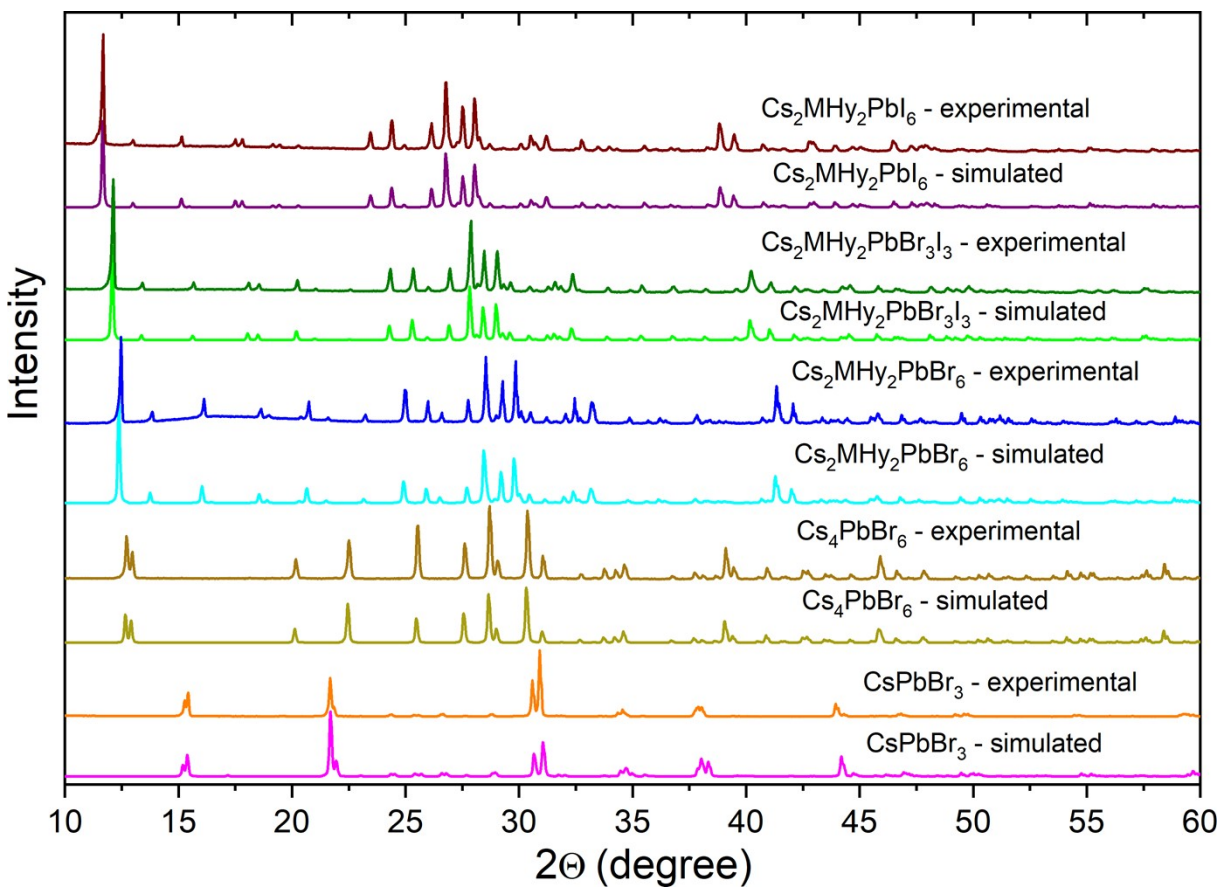

**Fig. S1.** Powder X-ray diffractograms of the synthesized samples (experimental) together with the simulated ones based on the RT structures.

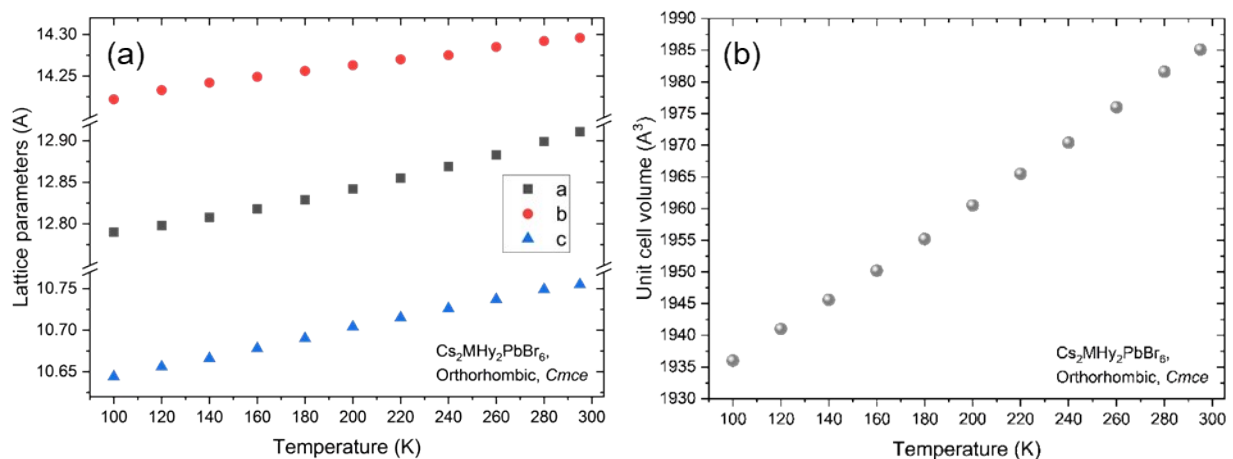

**Fig. S2.** The temperature evolution of (a) lattice parameters and (b) unit cell volume in  $\text{Cs}_2\text{MHy}_2\text{PbBr}_6$ .

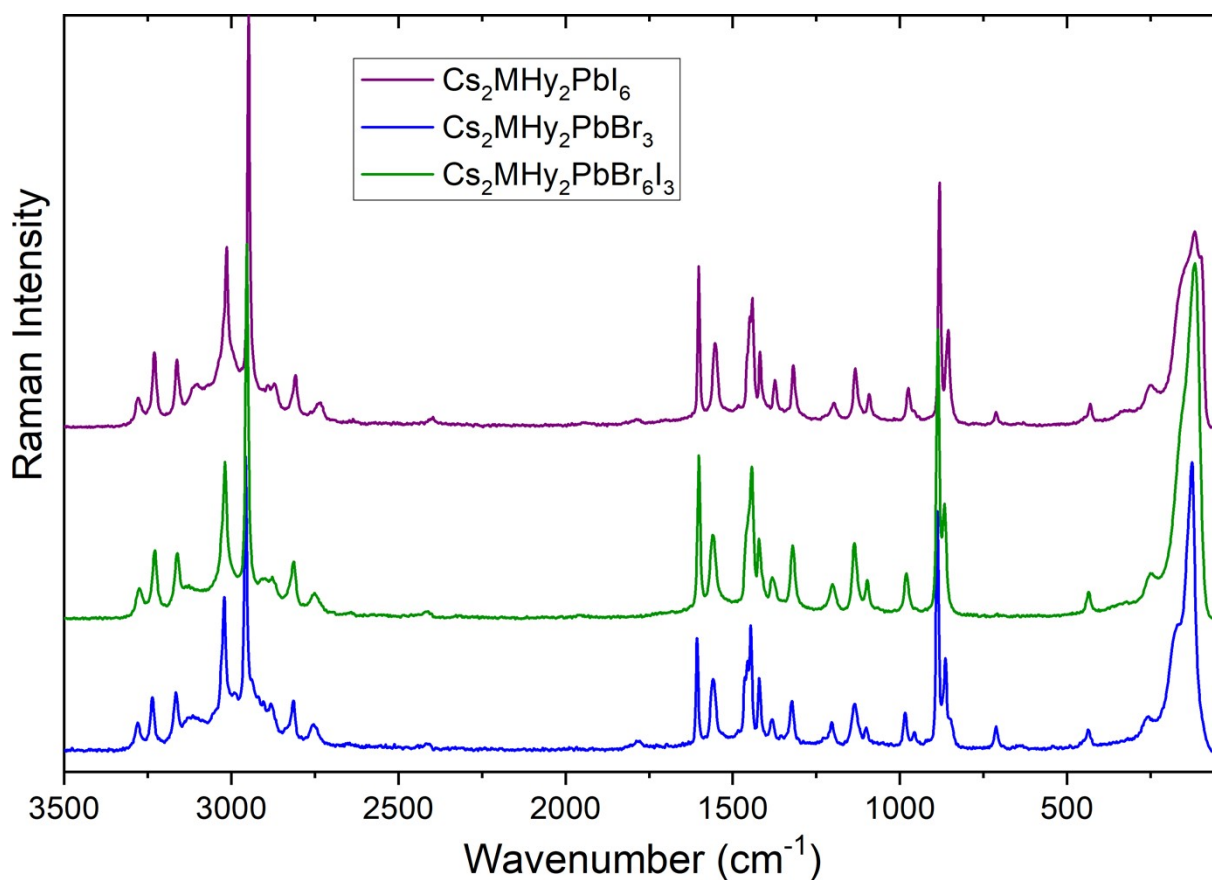

**Fig. S3.** Raman spectra of  $\text{Cs}_2\text{MHy}_2\text{PbX}_6$  compounds in the 3500-100  $\text{cm}^{-1}$  range.

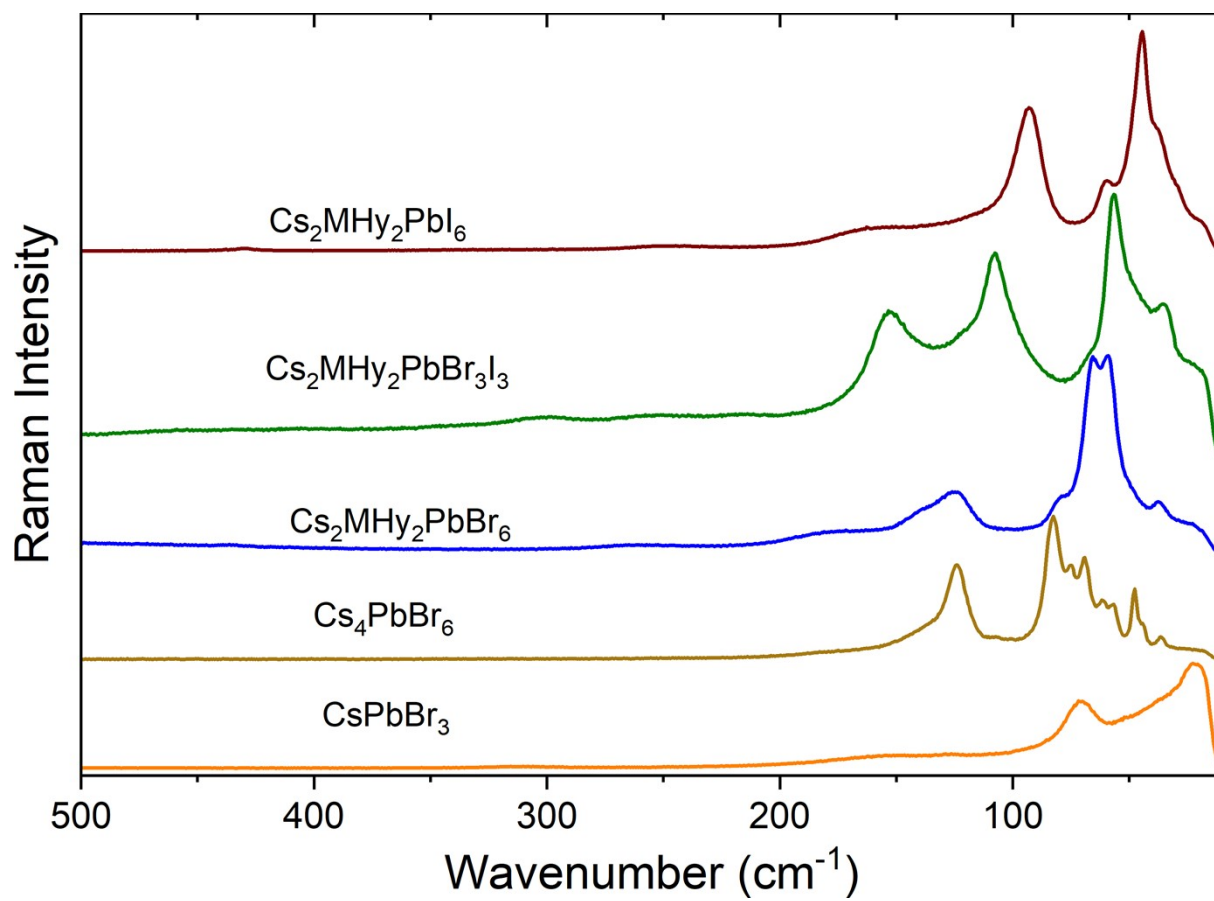

**Fig. S4.** Raman spectra of Cs<sub>2</sub>MHy<sub>2</sub>PbX<sub>6</sub> compounds in the 500-10 cm<sup>-1</sup> range. For the comparison sake, Raman spectra of all-inorganic CsPbBr<sub>3</sub> and Cs<sub>4</sub>PbBr<sub>6</sub> are also shown.

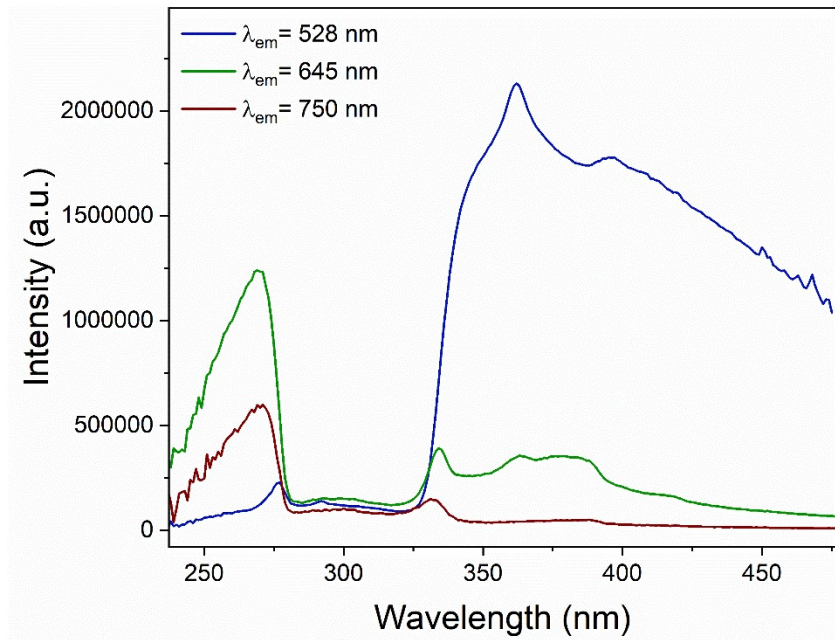

**Fig. S5.** The emission-wavelength-dependent PL excitation spectra of the representative  $\text{Cs}_2\text{MHy}_2\text{PbBr}_6$  sample.

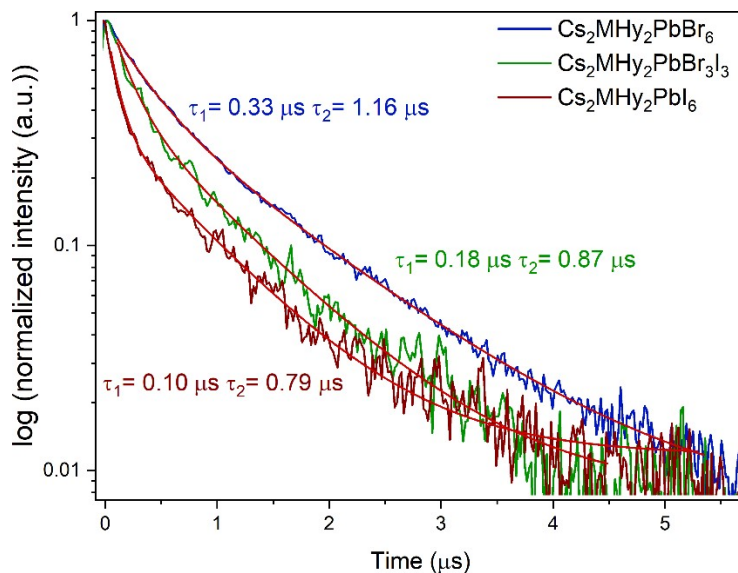

**Fig. S6.** Low temperature(80 K) emission decay curves of  $\text{Cs}_2\text{MHy}_2\text{PbX}_6$  ( $X = \text{Br}, \text{I}$ ) and  $\text{Cs}_2\text{MHy}_2\text{PbBr}_3\text{I}_3$  crystals and calculated lifetimes.

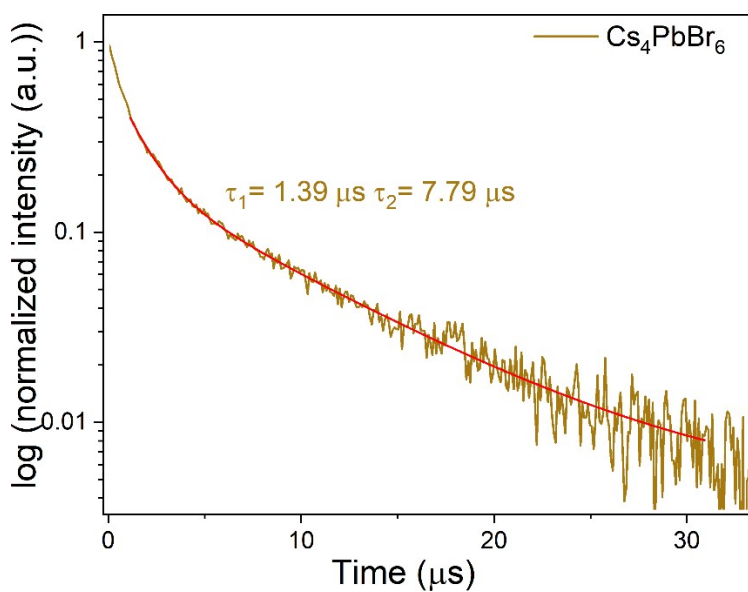

**Fig. S7.** Low temperature(80 K) emission decay curves of  $\text{Cs}_2\text{MHy}_2\text{PbX}_6$  ( $X = \text{Br}, \text{I}$ ) and  $\text{Cs}_2\text{MHy}_2\text{PbBr}_3\text{I}_3$  crystals and calculated lifetimes.

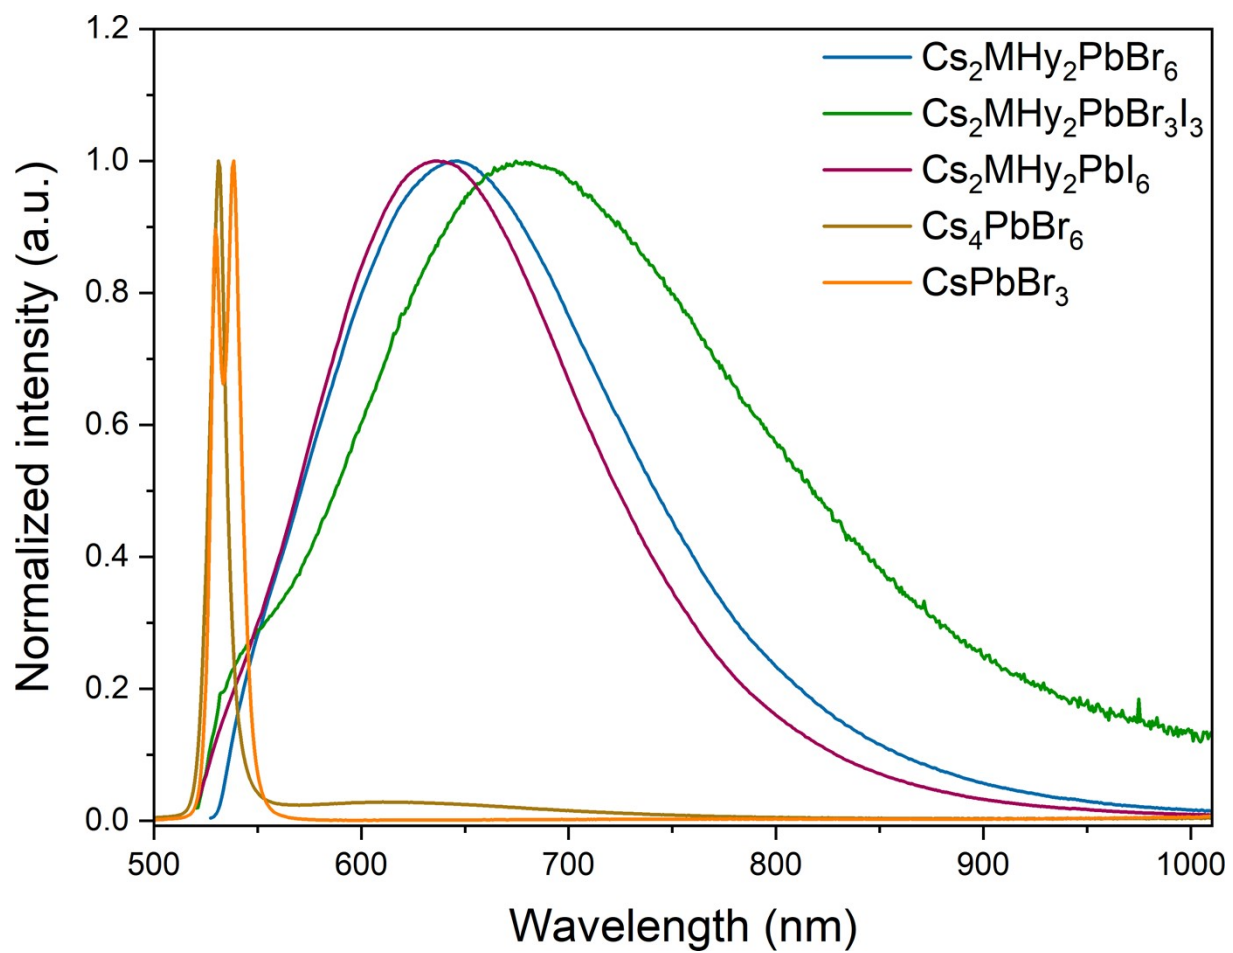

**Fig. S8.** Collation of the normalized emission spectra of investigated hybrid lead halide perovskites with inorganic  $\text{Cs}_4\text{PbBr}_6$  and  $\text{CsPbBr}_3$  compounds.

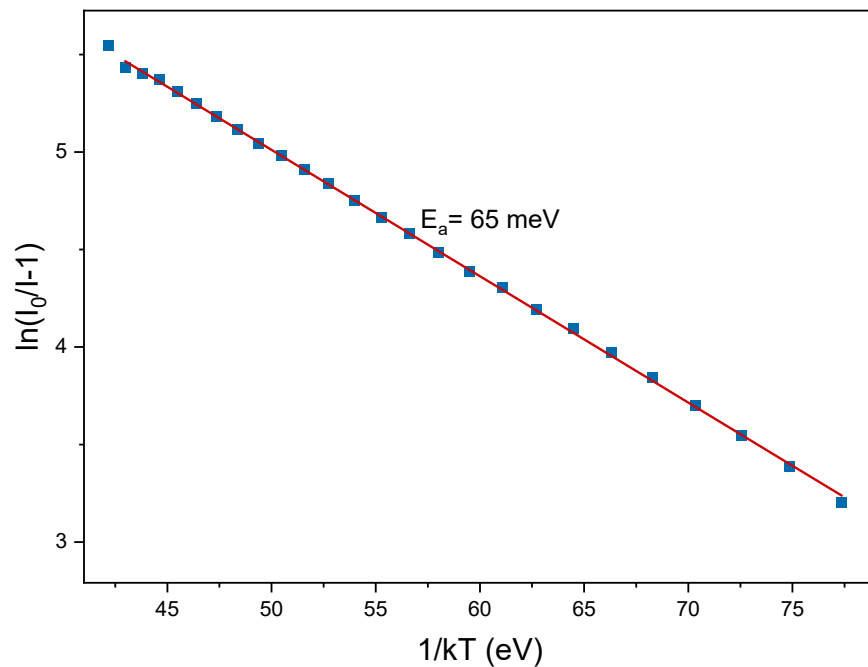

**Fig. S9.** Logarithm of  $I_0/I-1$  as a function of  $1/kT$ , of  $\text{Cs}_2\text{MHy}_2\text{PbBr}_6$ .  $E_a$  was extracted by fitting the Arrhenius equation.

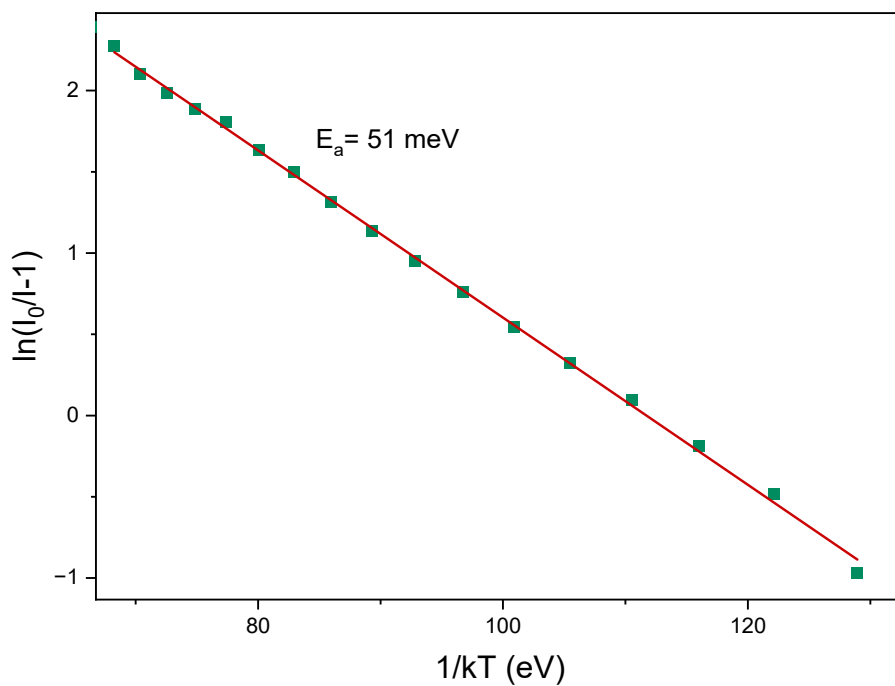

**Fig. S10.** Logarithm of  $I_0/I-1$  as a function of  $1/kT$ , of  $\text{Cs}_2\text{MHy}_2\text{PbBr}_3\text{I}_3$ .  $E_a$  was extracted by fitting the Arrhenius equation.



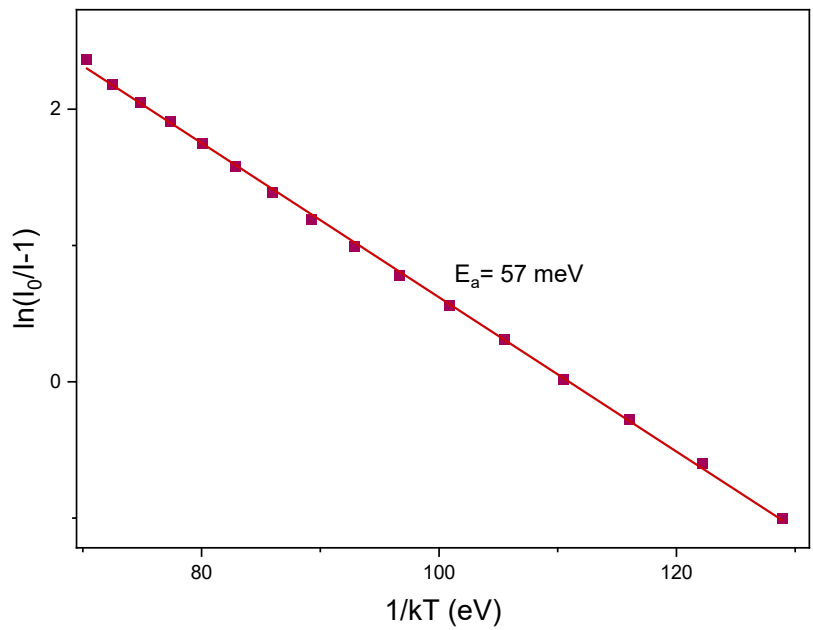

**Fig. S11.** Logarithm of  $I_0/I-1$  as a function of  $1/kT$ , of  $\text{Cs}_2\text{MHy}_2\text{PbI}_6$ .  $E_a$  was extracted by fitting the Arrhenius equation.
